# Supplementary material
Source: PubMed Central journal article supplement (PMC2049065)
Supplement: ajrccm_176_1_63__1.pdf [file ajrccm_176_1_63__1.pdf]

## **ONLINE DATA SUPPLEMENT**

Bubble continuous positive airway pressure enhances lung volume and gas exchange in preterm lambs

J. Jane Pillow, Noah Hillman, Timothy JM Moss, Graeme Polglase, Geoff Bold, Chris Beaumont, Machiko Ikegami, Alan H. Jobe

### **DETAILED METHODS**

Investigations were approved by the animal ethics committee of the Western Australia Department of Agriculture and Cincinnati Children's Hospital Medical Centre. Animals were in a flock of sheep quarantined for foot rot, although there was no evidence of foot rot in any of the animals that we used.

#### *Animals, Delivery and Postnatal Care*

We used a previously described ovine model of lung disease in moderately preterm lambs treated with CPAP via tracheal tube (1). Labor was induced at 131-132 d gestation in date-mated Merino ewes carrying twins with 20 mg IV Epostane (Sanobi-Synthelabo, PA, USA) and 0.5 mg/kg IM Betamethasone (Celestone Chronodose; Schering Plough, NSW, Australia). Lambs were delivered alive 40 h later by hysterotomy immediately following penetrating captive bolt euthanasia to the pregnant ewe. Lambs (n=5) randomized to no ventilation were killed (50 mg/kg pentobarbital IV) directly after delivery. The remaining lambs were dried, intubated with a 4.5 mm internal diameter, cuffed tracheal tube (Portex Ltd, UK) and treated with continuous positive airway pressure (CPAP) using heated, humidified 100% oxygen. Treated lambs were quasi-randomized to three groups: constant pressure CPAP (Bournes BP200, USA) with a bias flow of 8 L/min (n=12); or bubble CPAP using the same disposable circuit (Fisher & Paykel Healthcare, Auckland, NZ) and a bias flow of 8 L/min (n=12) or 12 L/min (n=10). The depth of underwater seal in the Bubble CPAP circuits was adjusted to achieve similar mean pressures at the airway opening to those obtained with the constant pressure CPAP system measured using a pressure transducer encased within a neonatal respiratory monitor (Florian, Acutronics, Ch). The unsedated, spontaneously breathing lambs were positioned prone, covered with plastic wrap and kept warm on an infant radiant warmer (Fisher & Paykel Healthcare, NZ). Blood obtained from a catheter inserted 20 cm through an umbilical artery into the aorta, was used for blood gas and pH measurements at regular intervals throughout the study (15, 30, 45, 60, 90, 120, 150 min).

### ***Physiological Measurements***

Physiological differences between the two treatments were assessed at 2.5 h after attainment of clinical stability (2) using an infant lung function system (Exhalyser, EcoMedics, Duernten, CH). The system incorporated an ultrasonic flowmeter to measure flow and molar mass, a mainstream infrared CO<sub>2</sub> analyser (Duet EtCO<sub>2</sub>, Welch-Allyn OEM Technologies, OR, USA) and sidestream laser diode O<sub>2</sub> sensor with visible spectrum absorption spectroscopy analysis (Oxygraf, CA, USA). Tidal flow parameters were determined from 30 s data epochs recorded during regular quiet breathing using a sampling frequency of 200 Hz. Peak and trough CO<sub>2</sub> and O<sub>2</sub> were manually determined for each breath during the 30 s interval to determine average volume of CO<sub>2</sub> removal ( $\Delta\text{CO}_2$ ) and O<sub>2</sub> ( $\Delta\text{O}_2$ ) extraction. CO<sub>2</sub> and O<sub>2</sub> measurements were corrected for sampling delays. Respiratory quotient was determined as  $\Delta\text{CO}_2/\Delta\text{O}_2$ . Pressure was measured at the patient tracheal tube connector.

### ***Multiple Breath Washout***

Multiple breath washout was performed using an adaptation of existing methodology (3). A sideport, positioned approximately 2 cm proximal to the patient tracheal tube connector, was used to blend a low flow sulfur-hexafluoride/oxygen mixture (79 % SF<sub>6</sub>/21% O<sub>2</sub>) with the bias flow, to achieve a concentration of 4% SF<sub>6</sub> at the airway opening during washin. The supplemental SF<sub>6</sub> flow was replaced by medical air during the washout to maintain constant flow and inspired oxygen concentrations throughout the study. Washout traces were analysed using commercial software (Wbreath v3.10.3.0, NddMedizintechnik Ag, Zurich, Ch). Functional residual capacity (FRC) was determined from the cumulative exhaled tracer gas (SF<sub>6</sub>) divided by the difference in end tidal SF<sub>6</sub> concentration at the start and at completion of the washout. The number of lung volume turnovers at any given breath during the washout was calculated as the cumulative expired volume at that breath divided by the FRC determined at mid-sensor point. The cumulative expired volume was corrected for the external dead space between the sensor and the bias flow. The lung clearance index (LCI) was

calculated as the number of turnovers needed to lower the end tidal tracer gas concentration to  $1/40^{\text{th}}$  of the starting concentration (4).

### ***Forced Oscillatory Mechanics***

The mechanical impedance of the lower respiratory system was measured with customized measuring equipment using the low-frequency forced oscillation technique (5, 6).

Mechanical impedance of the lower respiratory system ( $Z_{\text{LRS}}$ ) was obtained using the low-frequency forced oscillation technique (LFOT) as previously described (5, 6).  $Z_{\text{LRS}}$  spectra computed from four paired measurements of tracheal pressure and oscillatory flow ( $V'$ ) at each time point were averaged and a model comprising an airway compartment with a frequency-independent (Newtonian) resistance ( $R_{\text{aw}}$ ), an inertance ( $I_{\text{aw}}$ ) and a constant-phase tissue compartment characterized by coefficients of tissue damping (resistance) ( $G$ ) and elastance ( $H$ ) was fitted to the averaged spectra (see Figure 2) (7) according to Equation 1:

$$Z_{rs} = R_{aw} + jI_{aw} + \left[ (G - jH) / \omega^\alpha \right] \quad \text{Equation E1}$$

where  $R_{\text{aw}}$  is the airway resistance,  $I_{\text{aw}}$  is the airway inertance,  $j = \sqrt{-1}$ ,  $G$  and  $H$  are the coefficients for tissue damping and tissue elastance respectively,  $\omega$  is angular frequency, and  $\alpha$  determines the frequency dependence of the real and imaginary parts of the impedance.

### ***Lung Processing***

Lambs were humanely killed with an overdose of pentobarbital at 3 h age and the tracheal tube was clamped for 3 min to facilitate oxygen absorption and lung collapse. The lamb thorax was opened and the pressure-volume relationship of the deflation limb was determined (8). Volumes were corrected for the system compliance.

Tissue from the right lower lobe was immediately frozen in liquid nitrogen for wet to dry ratio and Saturated Phosphatidylcholine (Sat PC) assay. An alveolar wash of the left lung was performed with 0.9 % NaCl at 4 °C. Three repeated saline bronchoalveolar lavages were pooled (1), and aliquots were saved for measurement of Sat PC (9, 10), and total protein (11) Sat PC was isolated from chloroform-methanol (2:1) extracts of alveolar washes by neutral

alumina column chromatography after exposure of lipid extracts to osmium tetroxide (9) and quantified by phosphorus assay (10).

### ***Data Analysis and Statistics***

Results are shown as mean ( $\pm$  SEM). Statistics were analysed using SPSS v14.0 (SPSS Inc, USA). Two tailed unpaired T-tests were used for comparing the effect of flow on variables within the bubble CPAP group. Two way ANOVA was used for all other statistical comparisons with CPAP level and applied bias flow as the independent factors. Significance was accepted as  $p < 0.05$ .

### **RESULTS**

Supplemental results highlight the absence of any significant effect of bias flow on physiological outcome variables in the Bubble CPAP groups. Changes in gas exchange over time are shown in Figure E4, whilst Table E1 shows the comparison of physiological variables between lambs treated with 8 L/min or 12 L/min bias flow. Table E2 details the two-way ANOVA of the arterial blood gas time course data.

**REFERENCES**

- E1. Jobe, A. H., B. W. Kramer, T. J. Moss, J. P. Newnham, and M. Ikegami. 2002. Decreased indicators of lung injury with continuous positive expiratory pressure in preterm lambs. *Pediatr Res* 52(3):387-392.
- E2. Mulrooney, N., Z. Champion, T. J. Moss, I. Nitsos, M. Ikegami, and A. H. Jobe. 2004. Surfactant and Physiological Responses of Preterm Lambs to Continuous Positive Airway Pressure. *Am J Respir Crit Care Med* 2004;171(5):488-493.
- E3. Schibler, A., and R. Henning. 2001. Measurement of functional residual capacity in rabbits and children using an ultrasonic flow meter. *Pediatr Res* 49(4):581-588.
- E4. Larsson, A., C. Jonmarker, and O. Werner. 1988. Ventilation inhomogeneity during controlled ventilation. Which index should be used? *J Appl Physiol* 65(5):2030-2039.
- E5. Pillow, J. J., P. D. Sly, and Z. Hantos. 2004. Monitoring of lung volume recruitment and derecruitment using oscillatory mechanics during high-frequency oscillatory ventilation in the preterm lamb. *Pediatr Crit Care Med* 5(2):172-180.
- E6. Pillow, J. J., A. H. Jobe, R. A. Collins, Z. Hantos, M. Ikegami, T. J. M. Moss, J. P. Newnham, K. E. Willet, and P. D. Sly. 2004. Variability in preterm lamb lung mechanics after intra-amniotic endotoxin is associated with changes in surfactant pool size and morphometry. *Am J Physiol Lung Cell Mol Physiol* 287(5):L992-L998.
- E7. Hantos, Z., B. Daroczy, B. Suki, S. Nagy, and J. J. Fredberg. 1992. Input impedance and peripheral inhomogeneity of dog lungs. *J Appl Physiol* 72(1):168-178.
- E8. Jobe, A. H., D. Polk, M. Ikegami, J. Newnham, P. Sly, R. Kohen, and R. Kelly. 1993. Lung responses to ultrasound-guided fetal treatments with corticosteroids in preterm lambs. *J Appl Physiol* 75(5):2099-2105.
- E9. Mason, R. J., J. Nellenbogen, and J. A. Clements. 1976. Isolation of disaturated phosphatidylcholine with osmium tetroxide. *J Lipid Res* 17(3):281-284.
- E10. Bartlett, G. R. 1959. Phosphorus assay in column chromatography. *J Biol Chem* 234(3):466-468.

- E11. Lowry, O. H., N. J. Rosebrough, A. L. Farr, and R. J. Randall. 1951. Protein measurement with the Folin phenol reagent. *J Biol Chem* 193(1):265-275.

**Figure E1 – Representative Tidal Breathing Waveforms:** Figure shows examples of tidal breathing waveforms recorded in lambs treated with constant pressure CPAP (left column) and bubble CPAP (right column):  $V_T$  - Tidal volume;  $V'$  - Flow; MM - Molar Mass;  $P_{ao}$  - pressure at the airway opening;  $O_2$  % respired Oxygen;  $CO_2$  - % respired Carbon Dioxide.

**Figure E2 - Multiple Breath Washout in Lamb on Constant Pressure CPAP:** Figure demonstrates changes in A) tidal volume ( $V_T$ ); B) flow ( $V'$ ); and C) molar mass (MM) over the course of a washout

**Figure E3 -- Representative Impedance Spectra:** Figure shows representative impedance spectra obtained from low-frequency forced oscillatory mechanics measurement of the lower respiratory system using a micropressure transducer positioned distal to the tip of the tracheal tube. The resistance is that portion of impedance in phase with flow and is the sum of two components: a frequency independent airway resistance and a frequency dependent tissue resistance. The reactance represents the portion of impedance out of phase with flow and is dominated at low frequencies by the tissue elastance (1/compliance) and at high frequencies by the airway inertance. The point at which reactance crosses the zero line (20 Hz in this example) represents the resonant frequency. The solid line represents the fit of an empirical model which describes the respiratory system as having a frequency independent airway resistance and inertance and a constant phase tissue compartment comprising an element of damping (resistance) and elastance.

**Figure E 4 - Effect of Bubble CPAP bias flow on Arterial Gas Exchange Variables:**

There was no difference between a bias flow of 8 L/min (closed circle) or 12 L/min (open circle) in the arterial pH (panel A),  $PaCO_2$  (panel B) or  $PaO_2$  (panel C) at any timepoint over the course of the study.



**Table E 1: Comparison of Physiological Variables between 8 L/min and 12 L/min Bias Flow in Bubble CPAP**

| Variable                                | Bubble 8 L/min<br>(n=12) | Bubble 12 L/min<br>(n=10) | p value |
|-----------------------------------------|--------------------------|---------------------------|---------|
| RR (breaths/min)                        | 74.5                     | 73.3                      | 0.90    |
| V <sub>T</sub> (mL/kg)                  | 5.8                      | 6.5                       | 0.20*   |
| MV (mL/kg/min)                          | 430                      | 477                       | 0.33    |
| AFV (mL <sup>2</sup> /kg/min)           | 578                      | 621                       | 0.34*   |
| FRC (mL/kg)                             | 25.6                     | 21.0                      | 0.14    |
| LCI                                     | 20.4                     | 25.1                      | 0.08    |
| Sat PC (μM/kg)                          | 3.05                     | 2.98                      | 0.72*   |
| Alveolar Protein (mg/kg)                | 4.88                     | 6.41                      | 0.16    |
| PaO <sub>2</sub> (mmHg) at 2.5 hr       | 369                      | 294                       | 0.14    |
| PaCO <sub>2</sub> (mmHg) at 2.5 hr      | 64.2                     | 68.1                      | 0.16    |
| Delta O <sub>2</sub> (mL/kg/min)        | 7.31                     | 6.98                      | 0.33    |
| Delta CO <sub>2</sub> (mL/kg/min)       | 6.45                     | 6.52                      | 0.88    |
| RQ                                      | 0.93                     | 0.98                      | 0.60    |
| Raw                                     | 3.33                     | 1.49                      | 0.07    |
| G (L/cmH <sub>2</sub> O)                | 131                      | 119                       | 0.25    |
| Compliance (1/H) (L/cmH <sub>2</sub> O) | 1.70                     | 1.74                      | 0.81    |
| V <sub>40</sub> (mL/kg)                 | 96.7                     | 101.6                     | 0.28    |

RR – respiratory rate; V<sub>T</sub> – tidal volume; MV – minute volume; AFV – area under the flow volume curve; FRC – functional residual capacity; LCI – lung clearance index; Sat PC – saturated phosphatidylcholine; PaO<sub>2</sub> – partial pressure of oxygen in arterial blood; PaCO<sub>2</sub> – partial pressure of carbon dioxide in arterial blood; Delta O<sub>2</sub> – oxygen extraction; Delta CO<sub>2</sub> – CO<sub>2</sub> removal; RQ – respiratory quotient; R<sub>aw</sub> – airway resistance; G – tissue damping; H – tissue elastance; V<sub>40</sub> – static lung volume at 40 cmH<sub>2</sub>O. P value for Unpaired Student’s T-test

## Bubble CPAP and Lung Volume Recruitment

or Mann-Whitney Rank Sum Test. \* indicates nonparametric data compared using Mann-Whitney Rank Sum Test.

**Table E 2 – Results of Two-Way ANOVA of Time Course Arterial Blood Gas Measurements Comparing Effect of CPAP Type and Bias Flow**

| Variable                    | Time<br>(min) | CP          | B8          | B12         | P value      |              |
|-----------------------------|---------------|-------------|-------------|-------------|--------------|--------------|
|                             |               |             |             |             | CPAP vs Type | CPAP vs Flow |
| pH                          | 0             | 7.41 (0.07) | 7.41 (0.86) | 7.31 (0.06) | 0.97         | 0.87         |
|                             | 15            | 7.16 (0.10) | 7.19 (0.10) | 7.41 (0.03) | 0.57         | 0.41         |
|                             | 30            | 7.21 (0.09) | 7.25 (0.10) | 7.22 (0.10) | 0.36         | 0.94         |
|                             | 60            | 7.27 (0.11) | 7.32 (0.06) | 7.24 (0.11) | 0.15         | 0.94         |
|                             | 90            | 7.29 (0.08) | 7.33 (0.02) | 7.33 (0.07) | 0.10         | 0.73         |
|                             | 120           | 7.26 (0.10) | 7.35 (0.03) | 7.27 (0.11) | 0.007*       | 0.73         |
|                             | 150           | 7.27 (0.12) | 7.35 (0.06) | 7.29 (0.07) | 0.033*       | 0.35         |
| PaCO <sub>2</sub><br>(mmHg) | 0             | 64.4 (11.2) | 62.3 (14.7) | 56.5 (8.6)  | 0.66         | 0.27         |
|                             | 15            | 86.8 (12.6) | 79.1 (14.7) | 73.3 (6.2)  | 0.13         | 0.27         |
|                             | 30            | 79.8 (9.9)  | 70.4 (11.2) | 72.2 (11.5) | 0.040*       | 0.69         |
|                             | 60            | 76.6 (19.6) | 66.7 (7.5)  | 64.5 (10.4) | 0.088        | 0.71         |
|                             | 90            | 76.6 (18.2) | 63.3 (7.5)  | 66.5 (8.2)  | 0.014*       | 0.55         |
|                             | 120           | 80.4 (21.3) | 64.7 (4.9)  | 68.4 (6.63) | 0.008*       | 0.53         |
|                             | 150           | 83.1 (30.9) | 65.9 (7.5)  | 72.0 (8.1)  | 0.039*       | 0.47         |
| PaO <sub>2</sub><br>(mmHg)  | 0             | 9.4 (4.2)   | 9.7 (6.3)   | 8.6 3.7     | 0.89         | 0.63         |
|                             | 15            | 297 (164)   | 359 (147)   | 362 96.8    | 0.29         | 0.96         |
|                             | 30            | 243 (162)   | 315 (123)   | 275 96.2    | 0.19         | 0.49         |
|                             | 60            | 278 (158)   | 2659 (134)  | 296 87.2    | 0.87         | 0.63         |
|                             | 90            | 277 (127)   | 316 (96.5)  | 339 89.1    | 0.38         | 0.62         |
|                             | 120           | 270 (152)   | 358 (118)   | 312 96.7    | 0.099        | 0.40         |
|                             | 150           | 264 (163)   | 381 (92.8)  | 317 (77.9)  | 0.023*       | 0.22         |

Values shown as Mean (SD); CP – constant pressure; B8 - bubble CPAP 8 L/min bias flow;

B12 - bubble CPAP 12 L/min bias flow; \* p < 0.05

# Bubble CPAP and Lung Volume Recruitment

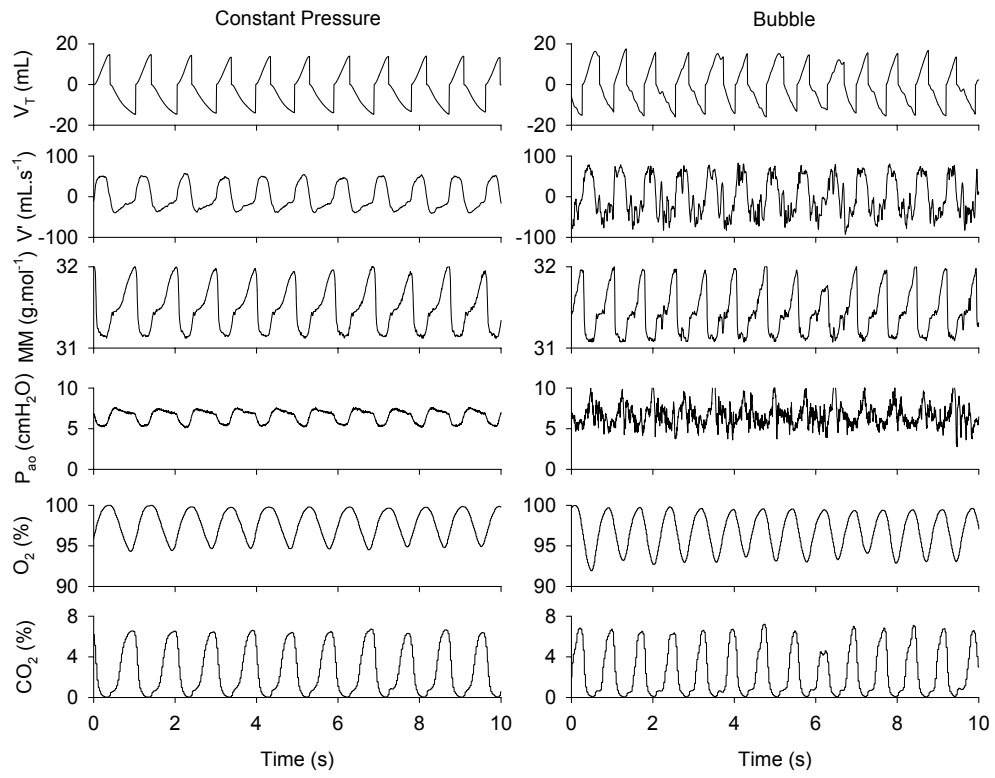

Figure E1

# Bubble CPAP and Lung Volume Recruitment

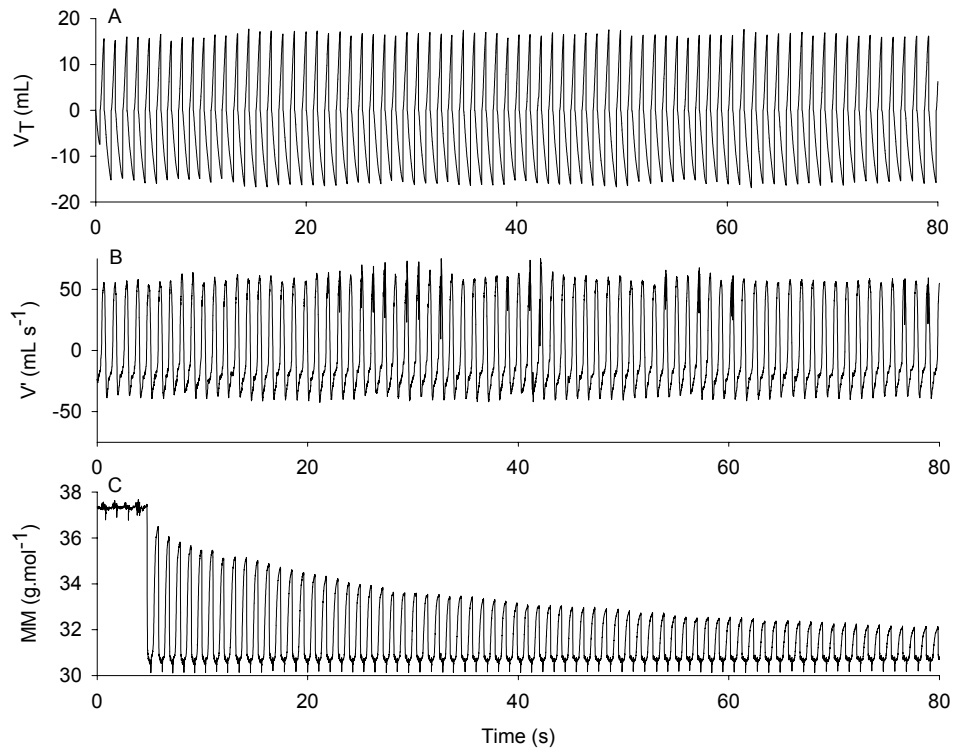

Figure E2

# Bubble CPAP and Lung Volume Recruitment

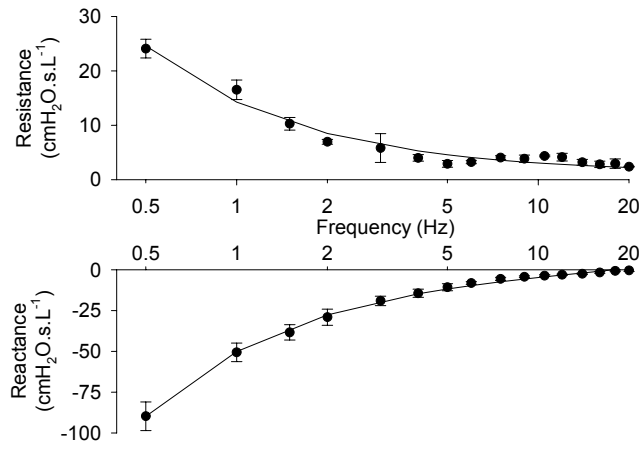

Figure E3

# Bubble CPAP and Lung Volume Recruitment

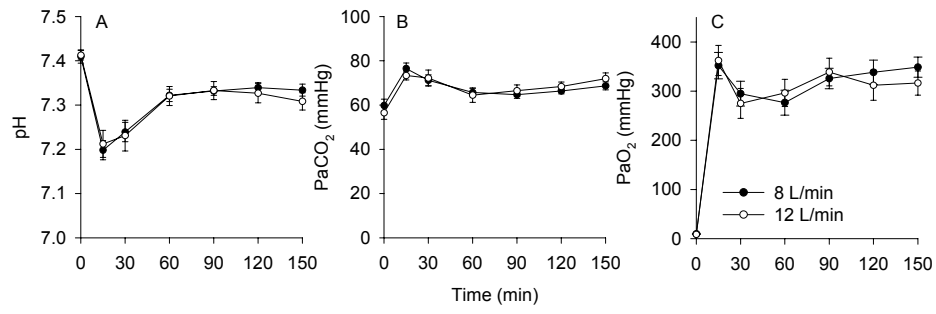

Figure E4
